# Supplementary material for: A real-world exploration into clinical outcomes of direct oral anticoagulant therapy in people with chronic kidney disease: a large hospital-based study
Source: Springer Nature journal article supplement (doi:10.1007/s40620-024-01930-x), 2024-04-02
Supplement: MOESM1 [file 40620_2024_1930_MOESM1_ESM.pdf]

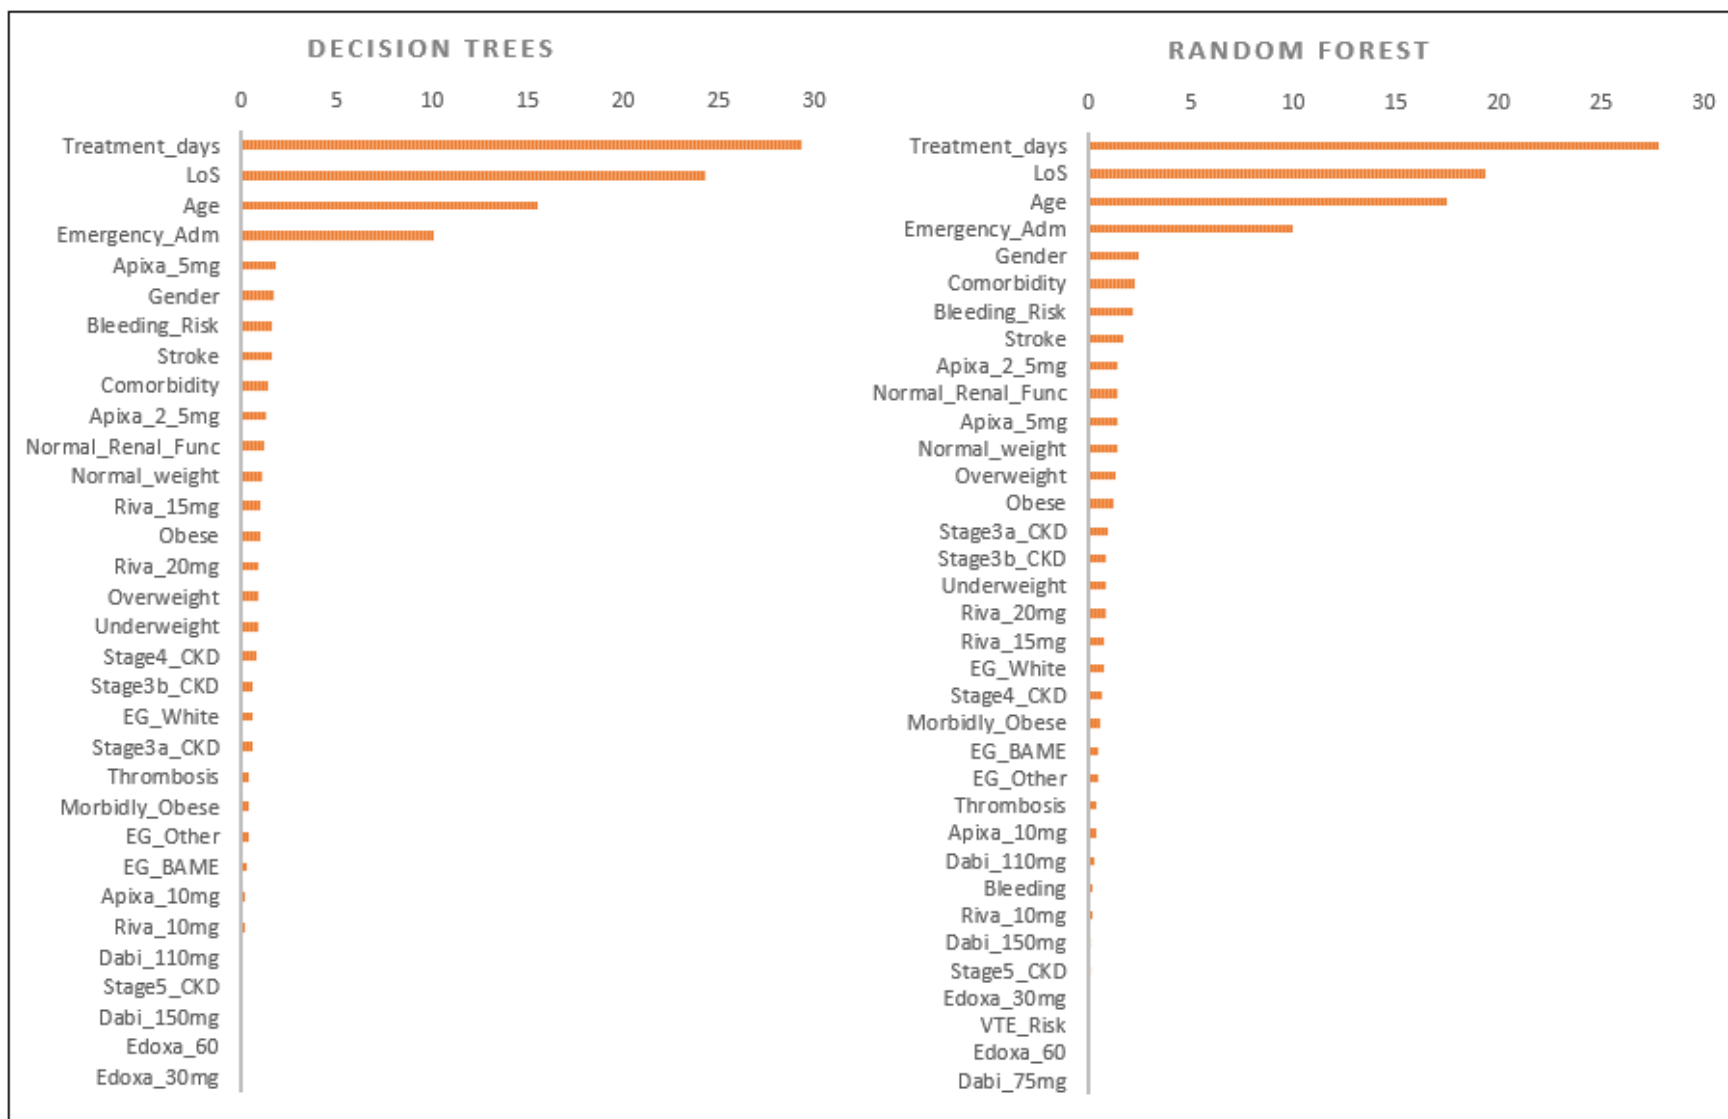

**Figure S1:** Ranking of features with the overall patient dataset according to their importance in contributing to mortality using Random Forest and Decision Trees.

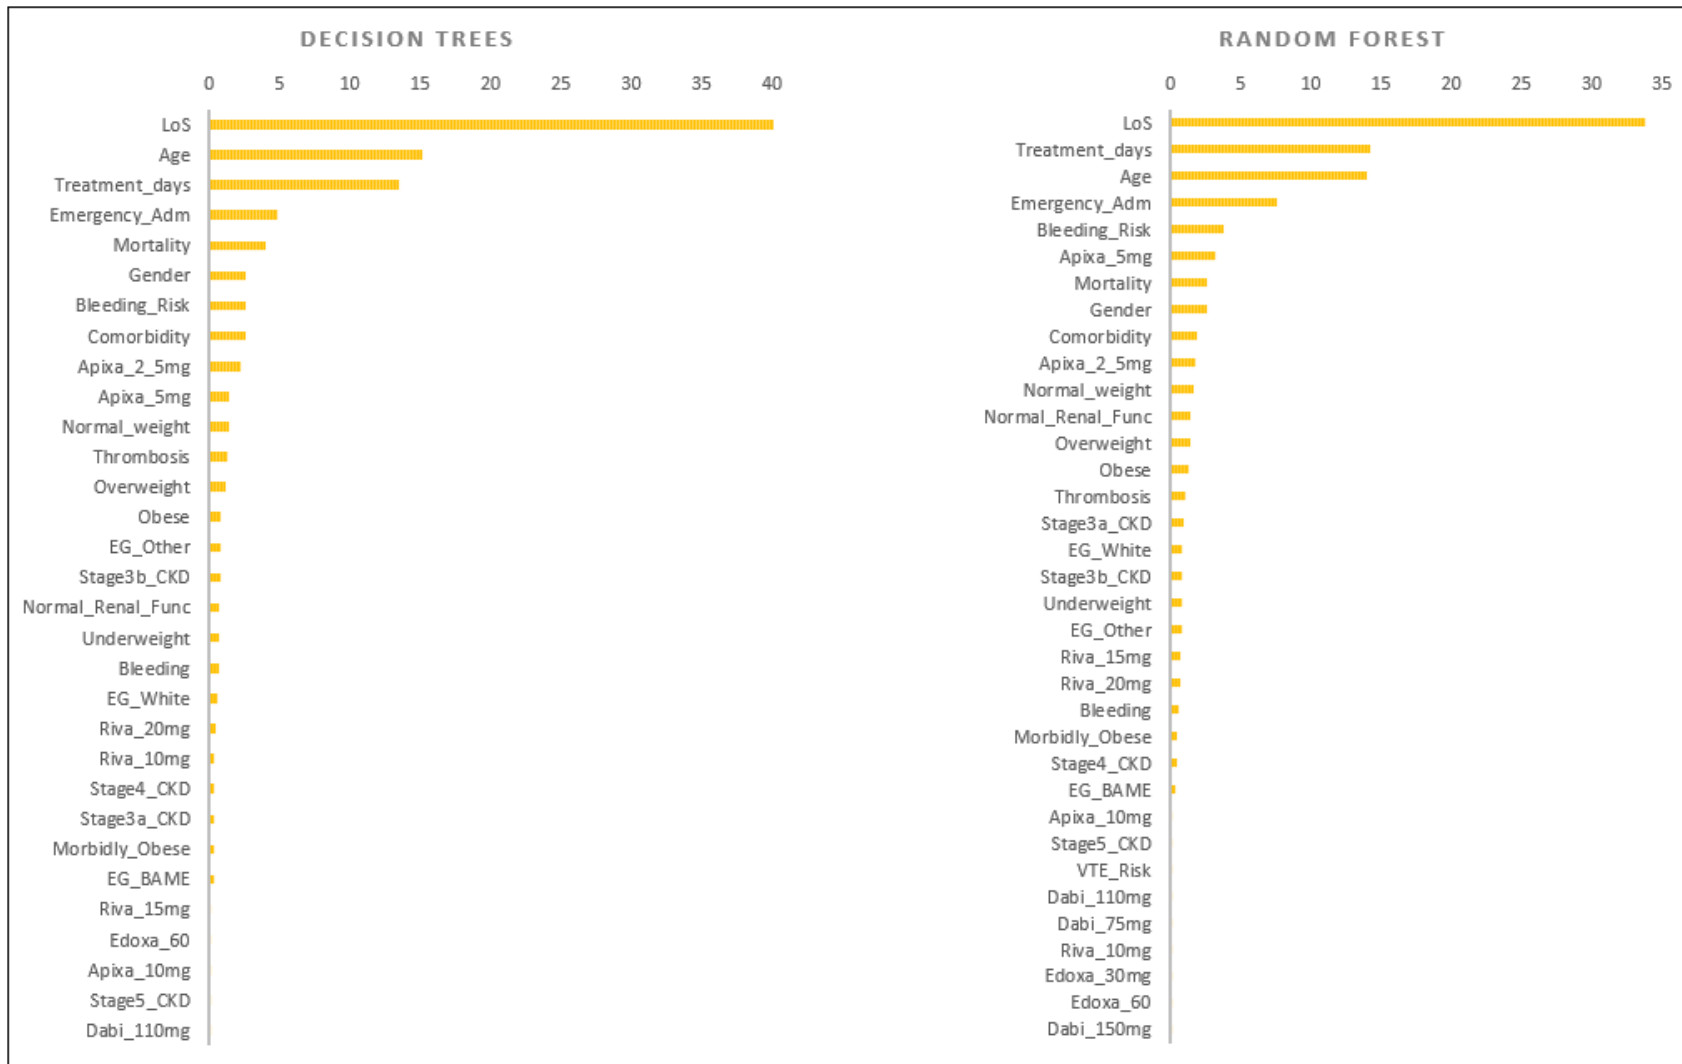

**Figure S2:** Ranking of features with the overall patient dataset according to their importance in contributing to stroke using Random Forest and Decision Trees. EG=ethnic group
