# Supplementary material for: A real-world exploration into clinical outcomes of direct oral anticoagulant therapy in people with chronic kidney disease: a large hospital-based study
Source: Springer Nature journal article supplement (doi:10.1007/s40620-024-01930-x), 2024-04-02
Supplement: MOESM2 [file 40620_2024_1930_MOESM2_ESM.pdf]

**Table S1:** The overall accuracy of each of the ML classifiers used in the study.

| Machine learning algorithm   | Accuracy in Stroke prediction | Accuracy in mortality prediction |
|------------------------------|-------------------------------|----------------------------------|
| Decision Trees               | 0.998                         | 0.988                            |
| k Nearest Neighbour          | 0.994                         | 0.974                            |
| Random Forest                | 0.999                         | 0.994                            |
| Logistic regression          | 0.865                         | 0.749                            |
| Gradient Boosting classifier | 0.911                         | 0.811                            |
| Support vector machine       | 0.911                         | 0.811                            |

**Table S2:** Performance metrics for the DOAC doses based on different ML models.

| Outcomes             | Precision |      |      | Recall |      |      | F1-score |      |      | *Support            |
|----------------------|-----------|------|------|--------|------|------|----------|------|------|---------------------|
|                      | DTA       | RFA  | KNN  | DTA    | RFA  | KNN  | DTA      | RFA  | KNN  | DTA, RFA, BAA & KNN |
| <b>Stroke=Yes</b>    | 1.00      | 1.00 | 0.98 | 0.99   | 1.00 | 0.98 | 0.99     | 1.00 | 0.98 | 5180                |
| <b>Stroke=No</b>     | 1.00      | 1.00 | 1.00 | 1.00   | 1.00 | 1.00 | 1.00     | 1.00 | 1.00 | 24044               |
| <b>Mortality=Yes</b> | 0.99      | 0.99 | 0.98 | 0.99   | 0.99 | 0.97 | 0.99     | 0.99 | 0.97 | 14357               |
| <b>Mortality=No</b>  | 0.99      | 0.99 | 0.97 | 0.99   | 1.00 | 0.98 | 0.99     | 0.99 | 0.97 | 14867               |

**Table S3:** Summary of outcomes according to eGFR staging (for all the DOACs)

| eGFR Cat                               | Treatment Years | LoS in days   | Emergency visits | Bleeding Event (CRNMB) |             | Ischaemic Stroke |             | Any TE event |             | All-cause mortality |            |
|----------------------------------------|-----------------|---------------|------------------|------------------------|-------------|------------------|-------------|--------------|-------------|---------------------|------------|
|                                        |                 | Mean (SD)     | Mean (SD)        | Yes n (%)              | No n (%)    | Yes n (%)        | No n (%)    | Yes n (%)    | No n (%)    | Yes n (%)           | No n (%)   |
| <b>Normal Kidney Function (&gt;90)</b> | ≤1yr            | 41.04(33.150) | 1.46(1.741)      | 80(0.7)                | 10957(99.3) | 1936(18.1)       | 8741(81.9)  | 84(0.8)      | 10593(99.2) | 7011(65.7)          | 3666(34.3) |
|                                        | 2yrs            | 35.40(33.442) | 3.36(3.289)      | 18(0.4)                | 4506(99.6)  | 633(14.0)        | 3891(86.0)  | 85(1.9)      | 4439(98.1)  | 2072(45.8)          | 2452(54.2) |
|                                        | 3yrs            | 59.03(67.317) | 3.03(3.739)      | 151(3.3)               | 4390(96.7)  | 1225(27.0)       | 3316(73.0)  | 10(0.2)      | 4531(99.8)  | 1134(25.0)          | 3407(75.0) |
|                                        | 4yrs            | 37.71(35.152) | 2.77(4.190)      | 69(2.4)                | 2827(97.6)  | 630(21.8)        | 2266(78.2)  | 50(1.7)      | 2846(98.3)  | 410(14.2)           | 2486(85.8) |
|                                        | 5yrs            | 38.34(47.056) | 1.83(2.703)      | 0(0.0)                 | 1088(100)   | 407(37.4)        | 681(62.6)   | 0(0.0)       | 1088(100)   | 43(4.0)             | 1045(96.0) |
| <b>Non-CKD Stage 2 (60-89)</b>         | ≤1yr            | 33.91(28.531) | 1.73(2.150)      | 114(0.7)               | 16574(99.3) | 3004(18)         | 13684(82.0) | 161(1.0)     | 16527(99.0) | 11020(66.0)         | 5668(34.0) |
|                                        | 2yrs            | 29.34(28.182) | 2.88(3.075)      | 66(0.9)                | 6910(99.1)  | 1286(18.4)       | 5690(81.6)  | 90(1.3)      | 6686(98.7)  | 3033(43.5)          | 3943(56.5) |
|                                        | 3yrs            | 40.12(44.982) | 2.52(2.791)      | 47(0.7)                | 6691(99.3)  | 1923(28.5)       | 4815(71.5)  | 109(1.6)     | 6629(98.4)  | 1587(23.6)          | 5151(76.4) |
|                                        | 4yrs            | 29.84(34.488) | 2.19(2.634)      | 9(0.2)                 | 4561(99.8)  | 1027(22.5)       | 3543(77.5)  | 47(1.0)      | 4523(99.0)  | 393(8.6)            | 4177(91.4) |
|                                        | 5yrs            | 21.73(28.442) | 1.53(2.347)      | 0(0.0)                 | 1917(100)   | 313(16.3)        | 1604(83.7)  | 18(0.9)      | 1899(99.1)  | 98(5.1)             | 1819(94.9) |
| <b>Stage 3a (30-39.9)</b>              | ≤1yr            | 29.22(22.380) | 1.70(1.814)      | 146(1.6)               | 8950(98.4)  | 1292(14.2)       | 7804(85.8)  | 100(1.1)     | 8996(98.9)  | 6313(69.4)          | 2783(30.6) |
|                                        | 2yrs            | 30.69(24.473) | 2.97(3.220)      | 46(1.2)                | 3944(98.8)  | 649(16.3)        | 3341(83.7)  | 16(0.4)      | 3974(99.6)  | 1889(47.3)          | 2101(52.7) |
|                                        | 3yrs            | 31.30(27.956) | 3.54(3.374)      | 20(0.7)                | 2921(99.3)  | 443(15.1)        | 2498(84.9)  | 27(0.9)      | 2914(99.1)  | 990(33.7)           | 1951(66.3) |
|                                        | 4yrs            | 33.79(30.281) | 2.67(2.859)      | 0(0.0)                 | 1634(100.0) | 456(27.9)        | 1178(72.1)  | 0(0.0)       | 1634(100.0) | 190(11.6)           | 1444(88.4) |
|                                        | 5yrs            | 21.21(23.260) | 2.54(2.956)      | 0(0.0)                 | 736(100.0)  | 56(7.6)          | 680(92.4)   | 0(0.0)       | 736(100.0)  | 20(2.7)             | 716(97.3)  |
| <b>Stage 3b (≥40)</b>                  | ≤1yr            | 27.17(20.875) | 1.67(1.753)      | 40(0.5)                | 7306(99.5)  | 808(11.0)        | 6538(89.0)  | 78(1.1)      | 7268(98.9)  | 1991(72.9)          | 5118(27.1) |
|                                        | 2yrs            | 23.68(18.266) | 3.53(3.559)      | 0(0.00)                | 2670(100.0) | 284(10.6)        | 2386(89.4)  | 9(0.3)       | 2661(99.7)  | 1357(50.8)          | 1313(49.2) |
|                                        | 3yrs            | 28.97(25.491) | 3.58(2.932)      | 0(0.0)                 | 1652(100.0) | 271(16.4)        | 1381(83.6)  | 49(3.0)      | 1603(97.0)  | 595(36.0)           | 1057(64.0) |
|                                        | 4yrs            | 30.11(25.036) | 3.49(2.948)      | 0(0.0)                 | 704(100.0)  | 79(11.2)         | 625(88.8)   | 0(0.0)       | 704(100.0)  | 234(33.2)           | 470(66.8)  |
|                                        | 5yrs            | 21.70(18.276) | 2.19(2.296)      | 0(0.0)                 | 302(100.0)  | 68(22.5)         | 234(77.5)   | 0(0.0)       | 302(100.0)  | 15(5.0)             | 287(95.0)  |
| <b>Stage 4</b>                         | ≤1yr            | 24.05(19.940) | 1.69(1.475)      | 5(0.1)                 | 3811(99.9)  | 235(6.2)         | 3581(93.8)  | 29(0.6)      | 5113(99.4)  | 3166(83.0)          | 650(17.0)  |
|                                        | 2yrs            | 23.08(21.174) | 3.38(2.967)      | 0(0.0)                 | 671(100.0)  | 123(18.3)        | 548(81.7)   | 3(0.4)       | 668(99.6)   | 313(46.6)           | 358(53.4)  |
|                                        | 3yrs            | 27.26(23.176) | 3.51(2.846)      | 0(0.0)                 | 404(100.0)  | 26(6.4)          | 378(93.6)   | 3(0.7)       | 401(99.3)   | 185(45.8)           | 219(54.2)  |
|                                        | 4yrs            | 21.93(24.055) | 2.74(1.980)      | 0(0.0)                 | 204(100.0)  | 21(10.3)         | 183(89.7)   | 0(0.0)       | 204(100.0)  | 58(28.4)            | 146(71.6)  |
|                                        | 5yrs            | 25.04(17.256) | 2.79(2.084)      | 0(0.0)                 | 47(100.0)   | 2(4.3)           | 45(95.7)    | 0(0.0)       | 47(100.0)   | 0(0.0)              | 47(100.0)  |
| <b>Stage 5</b>                         | ≤1yr            | 27.23(15.302) | 1.44(1.305)      |                        | 431(100.0)  | 51(11.8)         | 380(88.2)   | 0(0.0)       | 431(100.0)  | 334(77.5)           | 97(22.5)   |
|                                        | 2yrs            | 28.73(20.656) | 3.54(2.320)      |                        | 63(100.0)   | 2(3.2)           | 61(96.8)    | 4(6.3)       | 59(93.7)    | 30(47.6)            | 33(52.4)   |
|                                        | 3yrs            | 51.60(92.006) | 3.60(2.296)      |                        | 40(100.0)   | 7(17.5)          | 33(82.5)    | 0(0.0)       | 40(100.0)   | 11(27.5)            | 29(72.5)   |
|                                        | 4yrs            | 32.22(18.811) | 3.12(3.480)      |                        | 50(100.0)   | 8(16.0)          | 42(84.0)    | 0(0.0)       | 50(100.0)   | 2(4.0)              | 48(96.0)   |
|                                        | 5yrs            | 1.00(—)       | —                |                        | 1(100.0)    | 0(0.0)           | 1(100.0)    | 0.0          | 1(100.0)    | 0(0.0)              | 1(100.0)   |

**Table S4:** Summary of outcomes according to DOAC type in patients at different stages of CKD

| DOACs              | CKD Stage | LoS               |                   | Emergency visits |             | CRNMB        |             | Ischaemic Stroke |             | Any TE Event |             | All-cause mortality |             |
|--------------------|-----------|-------------------|-------------------|------------------|-------------|--------------|-------------|------------------|-------------|--------------|-------------|---------------------|-------------|
|                    |           | > 1 week<br>n (%) | ≤ 1 week<br>n (%) | Yes<br>n (%)     | No<br>n (%) | Yes<br>n (%) | No<br>n (%) | Yes<br>n (%)     | No<br>n (%) | Yes<br>n (%) | No<br>n (%) | Yes<br>n (%)        | No<br>n (%) |
| <b>Apixaban</b>    | Normal    | 16592(85.0)       | 2938(15.0)        | 13657(69.9)      | 5873(30.1)  | 225(1.2)     | 19305(98.8) | 4111(21.0)       | 15419(79.0) | 101(0.5)     | 19429(99.5) | 8715(44.6)          | 10815(55.4) |
|                    | Non-CKD-2 | 24490(78.1)       | 6852(21.9)        | 23093(73.7)      | 8249(26.3)  | 215(0.7)     | 31127(99.3) | 7023(22.4)       | 24319(77.6) | 303(1.0)     | 31039(99.0) | 13578(43.3)         | 17764(56.7) |
|                    | CKD-3a    | 12923(83.6)       | 2539(16.4)        | 12,145(78.5)     | 3,317(21.5) | 210(1.4)     | 15252(98.6) | 2686(17.4)       | 12776(82.6) | 135(0.9)     | 15327(99.1) | 7835(50.7)          | 7627(49.3)  |
|                    | CKD-3b    | 9288(86.7)        | 1429(13.3)        | 8,765(81.8)      | 1952(18.2)  | 40(0.4)      | 10677(99.6) | 1362(12.7)       | 9355(87.3)  | 132(1.2)     | 10585(98.8) | 6365(59.4)          | 4352(40.6)  |
|                    | CKD-4     | 3842(84.6)        | 700(15.4)         | 3710(81.7)       | 832(18.3)   | 5(0.1)       | 4537(99.9)  | 398(8.8)         | 4144(91.2)  | 24(0.5)      | 4518(99.5)  | 3296(72.6)          | 1246(27.4)  |
|                    | CKD-5     | 432(90.0)         | 48(10.0)          | 380(79.2)        | 100(20.8)   | 0(0.0)       | 480(100.0)  | 66(13.8)         | 414(86.3)   | 0(0.0)       | 480(100.0)  | 298(62.1)           | 182(37.9)   |
| <b>Rivaroxaban</b> | Normal    | 3406(89.0)        | 422(11.0)         | 3143(82.1)       | 685(17.9)   | 93(2.4)      | 3735(97.6)  | 683(17.8)        | 3145(82.2)  | 128(3.3)     | 3700(96.7)  | 1715(44.8)          | 2113(55.2)  |
|                    | Non-CKD-2 | 4091(81.6)        | 924(18.4)         | 4259(84.9)       | 756(15.1)   | 21(0.4)      | 4994(99.6)  | 506(10.1)        | 4509(89.9)  | 122(2.4)     | 4893(97.6)  | 2230(44.5)          | 2785(55.5)  |
|                    | CKD-3a    | 2169(83.7)        | 423(16.3)         | 2175(83.9)       | 417(16.1)   | 2(0.1)       | 2590(99.9)  | 206(7.9)         | 2386(92.1)  | 8(0.3)       | 2584(99.7)  | 1379(53.2)          | 1213(46.8)  |
|                    | CKD-3b    | 1505(83.0)        | 309(17.0)         | 1589(87.1)       | 234(12.9)   | 0(0.0)       | 1814(100.0) | 111(6.1)         | 1703(93.9)  | 4(0.2)       | 1810(99.8)  | 1091(60.1)          | 723(39.9)   |
|                    | CKD-4     | 444(84.4)         | 82(15.6)          | 454(86.3)        | 72(13.7)    | 0(0.0)       | 526(100.0)  | 6(1.1)           | 520(98.9)   | 2(0.4)       | 524(99.6)   | 370(70.3)           | 156(29.7)   |
|                    | CKD-5     | 67(90.5)          | 7(9.5)            | 64(86.5)         | 10(13.5)    | 0(0.0)       | 74(100.0)   | 2(2.7)           | 72(97.3)    | 0(0.0)       | 74(100.0)   | 52(70.3)            | 22(29.7)    |
| <b>Edoxaban</b>    | Normal    | 44(86.3)          | 7(13.7)           | 12(23.5)         | 39(76.5)    | 0(0.0)       | 51(100)     | 30(58.8)         | 21(41.2)    | 0(0.0)       | 51(100)     | 11(21.6)            | 40(78.4)    |
|                    | Non-CKD-2 | 98(82.4)          | 21(17.6)          | 91(76.5)         | 28(23.5)    | 0(0.0)       | 119(100)    | 23(19.3)         | 96(80.7)    | 0(0.0)       | 119(100)    | 45(37.8)            | 74(62.2)    |
|                    | CKD-3a    | 81(86.2)          | 13(13.8)          | 86(91.5)         | 8(8.5)      | 0(0.0)       | 94(100.0)   | 4(4.3)           | 90(95.7)    | 0(0.0)       | 94(100.0)   | 36(38.3)            | 58(61.7)    |
|                    | CKD-3b    | 47(87.0)          | 7(13.0)           | 49(90.7)         | 5(9.3)      | 0(0.0)       | 54(100.0)   | 5(9.3)           | 5(90.7)     | 0(0.0)       | 54(100.0)   | 34(63.0)            | 20(37.0)    |
|                    | CKD-4     | 38(97.4)          | 1(2.6)            | 34(87.2)         | 5(12.8)     | 0(0.0)       | 39(100.0)   | 0(0.0)           | 39(100)     | 3(7.7)       | 36(92.3)    | 34(87.2)            | 5(12.8)     |
|                    | CKD-5     | 9(100.0)          | 0(0.0)            | 4(44.4)          | 5(55.6)     | 0(0.0)       | 9(100.0)    | 0(0.0)           | 9(100)      | 4(44.4)      | 5(55.6)     | 5(55.6)             | 4(44.4)     |
| <b>Dabigatran</b>  | Normal    | 276(87.1)         | 41(12.9)          | 279(88.0)        | 38(12.0)    | 0(0.0)       | 317(100)    | 7(2.2)           | 310(97.8)   | 0(0.0)       | 317(100)    | 229(72.2)           | 88(27.8)    |
|                    | Non-CKD-2 | 328(79.4)         | 85(20.6)          | 363(87.9)        | 50(12.1)    | 0(0.0)       | 413(100)    | 1(0.2)           | 412(99.8)   | 0(0.0)       | 413(100)    | 278(67.3)           | 135(32.7)   |
|                    | CKD-3a    | 192(77.1)         | 57(22.9)          | 213(85.5)        | 36(14.5)    | 0(0.0)       | 249(100.0)  | 0(0.0)           | 249(100)    | 0(0.0)       | 249(100.0)  | 152(61.0)           | 97(39.0)    |
|                    | CKD-3b    | 62(69.7)          | 27(30.3)          | 74(83.1)         | 15(16.9)    | 0(0.0)       | 89(100.0)   | 32(36.0)         | 57(64.0)    | 0(0.0)       | 89(100.0)   | 66(74.2)            | 23(25.8)    |
|                    | CKD-4     | 31(88.6)          | 4(11.4)           | 32(91.4)         | 3(8.6)      | 0(0.0)       | 35(100.0)   | 3(8.6)           | 32(91.4)    | 0(0.0)       | 35(100.0)   | 22(62.9)            | 13(37.1)    |
|                    | CKD-5     | 22(100.0)         | 0(0.0)            | 100.0            | 0.0         | 0(0.0)       | 22(100.0)   | 0(0.0)           | 22(100)     | 0(0.0)       | 22(100.0)   | 22(100.0)           | 0(0.0)      |

Table S5: Results of multivariate logistic regression analysis (showing the likelihood of the outcomes (odds ratio) for the CKD categories (Apixaban)

| eGFR Category<br>(CKD staging) | CRNMB               |         | Ischaemic stroke    |         | Any TE events       |         | All-cause mortality |         | LoS<br>(More than a week) |         | Emergency visit     |         |
|--------------------------------|---------------------|---------|---------------------|---------|---------------------|---------|---------------------|---------|---------------------------|---------|---------------------|---------|
|                                | OR<br>(95% CI)      | p-value | OR<br>(95% CI)            | p-value | OR<br>(95% CI)      | p-value |
| <b>Normal</b><br>(>90)         | Referent            |         |                     |         |                     |         |                     |         |                           |         |                     |         |
| <b>Non-CKD</b><br>(60-89)      | 0.62<br>(0.51-0.75) | 0.001   | 1.29<br>(1.23-1.35) | 0.001   | 1.46<br>(1.16-1.84) | 0.001   | 1.05<br>(1.01-1.10) | 0.023   | 0.55<br>(0.52-0.58)       | 0.001   | 1.26<br>(1.21-1.31) | 0.001   |
| <b>Stage 3a</b><br>(45 – 59.9) | 1.57<br>(1.29-1.91) | 0.001   | 0.91<br>(0.86-0.97) | 0.003   | 1.37<br>(1.05-1.78) | 0.021   | 1.20<br>(1.14-1.26) | 0.001   | 0.69<br>(0.64-0.74)       | 0.001   | 1.44<br>(1.37-1.52) | 0.001   |
| <b>Stage 3b</b><br>(30 – 44.9) | 0.44<br>(0.31-0.61) | 0.001   | 0.65<br>(0.60-0.70) | 0.001   | 2.04<br>(1.56-2.67) | 0.001   | 1.42<br>(1.35-1.51) | 0.001   | 0.72<br>(0.66-0.77)       | 0.001   | 1.55<br>(1.46-1.65) | 0.001   |
| <b>Stage 4</b><br>(15 – 29.9)  | 0.11<br>(0.05-0.28) | 0.001   | 0.56<br>(0.50-0.62) | 0.001   | 1.00<br>(0.64-1.58) | 0.995   | 2.12<br>(1.95-2.30) | 0.001   | 0.52<br>(0.47-0.57)       | 0.001   | 1.55<br>(1.42-1.68) | 0.001   |
| <b>Stage 5</b><br>(<15)        | -                   | 0.991   | 0.76<br>(0.57-1.01) | 0.056   | -                   | 0.993   | 1.17<br>(0.95-1.45) | 0.149   | 1.01<br>(0.73-1.38)       | 0.973   | 1.35<br>(1.07-1.69) | 0.010   |

NB: P-value cut-off was 0.001

Variables adjusted for stroke: ethnic group, gender, LoS Cat, BMI Cat, emergency visits cat, bleeding risk, mortality, treatment years, comorbidity, bleeding, thrombosis

Variables adjusted for mortality: ethnic group, gender, LoS, BMI Cat, emergency visits, bleeding risk, treatment days, comorbidity, bleeding, stroke, thrombosis

Variables adjusted for emergency visits: ethnic group, gender, LoS, BMI, bleeding risk, treatment days, comorbidity, bleeding, stroke, thrombosis, mortality

Variables adjusted for LoS: ethnic group, gender, BMI flag, bleeding risk, treatment days, comorbidity, bleeding, stroke, thrombosis, mortality, emergency visits

Table S6: Results of multivariate logistic regression analysis (showing the likelihood of the outcomes (odds ratio) for the CKD categories (normal RF)

| DOACs       | CRNMB                  |         | Ischaemic stroke        |         | Any TE events          |         | All-cause mortality     |         | LoS<br>(More than a week) |         | Emergency visit         |         |
|-------------|------------------------|---------|-------------------------|---------|------------------------|---------|-------------------------|---------|---------------------------|---------|-------------------------|---------|
|             | OR<br>(95% CI)         | p-value | OR<br>(95% CI)          | p-value | OR<br>(95% CI)         | p-value | OR<br>(95% CI)          | p-value | OR<br>(95% CI)            | p-value | OR<br>(95% CI)          | p-value |
| Apixaban    | 0.436<br>(0.336-0.565) | 0.001   | 1.527<br>(1.375-1.697)  | 0.001   | 0.205<br>(0.156-0.271) | 0.001   | 0.724<br>(0.665-0.788)  | 0.001   | 0.634<br>(0.564-0.714)    | 0.001   | 0.594<br>(0.542-0.652)  | 0.001   |
| Rivaroxaban | 2.329<br>(1.795-3.022) | 0.001   | 0.121<br>(0.061-0.240)  | 0.001   | 5.518<br>(4.175-7.294) | 0.001   | 3.606<br>(1.747-7.443)  | 0.001   | 2.925<br>(2.075-4.123)    | 0.001   | 5.216<br>(2.584-10.528) | 0.001   |
| Edoxaban    | NA                     | -       | 8.235<br>(4.161-16.299) | 0.001   | NA                     | -       | 0.277<br>(0.134-0.572)  | 0.001   | 0.329<br>(0.142-758)      | 0.001   | 0.192<br>(0.095-0.387)  | 0.001   |
| Dabigatran  | NA                     | -       | 0.111<br>(0.051-0.240)  | 0.001   | NA                     | -       | 9.219<br>(4.254-19.977) | 0.001   | 0.344<br>(0.238-0.499)    | 0.001   | 1.425<br>(0.999-2.034)  | 0.051   |

Variables adjusted for significant bleeding: ethnic group, gender, Cat. length of stay (LoS), BMI Cat, emergency visits, bleeding risk, mortality, treatment years, comorbidity, apixaban, rivaroxaban, edoxaban, dabigatran.

Variables adjusted for stroke: ethnic group, gender, Cat. length of stay (LoS), BMI Cat, emergency visits, bleeding risk, mortality, treatment years, comorbidity, apixaban, rivaroxaban, edoxaban, dabigatran..

Variables adjusted for thromboembolic event: ethnic group, gender, Cat. length of stay (LoS), BMI Cat, emergency visits, bleeding risk, mortality, treatment years, comorbidity, apixaban, rivaroxaban, edoxaban, dabigatran.

Variables adjusted for mortality: ethnic group, gender, Cat. length of stay (LoS), BMI Cat, emergency visits, bleeding risk, stroke, treatment days, comorbidity, apixaban, rivaroxaban, edoxaban, dabigatran.

Variables adjusted for emergency visits: ethnic group, gender, Cat. length of stay (LoS), BMI Cat, emergency visits, bleeding risk, mortality, treatment years, comorbidity, apixaban, rivaroxaban, edoxaban, dabigatran.

Variables adjusted for LoS: ethnic group, gender, BMI Cat, emergency visits, bleeding risk, mortality, treatment years, comorbidity, apixaban, rivaroxaban, edoxaban, dabigatran.

Table S7: Results of multivariate logistic regression analysis (showing the likelihood of the outcomes (odds ratio) for the CKD categories (Stage 2)

| DOACs       | CRNMB                  |         | Ischaemic stroke       |         | Any TE events          |         | All-cause mortality    |         | LoS<br>(More than a week) |         | Emergency visit        |         |
|-------------|------------------------|---------|------------------------|---------|------------------------|---------|------------------------|---------|---------------------------|---------|------------------------|---------|
|             | OR<br>(95% CI)         | p-value | OR<br>(95% CI)            | p-value | OR<br>(95% CI)         | p-value |
| Apixaban    | 1.630<br>(1.036-2.563) | 0.001   | 2.978<br>(2.692-3.294) | 0.001   | 0.420<br>(0.338-0.522) | 0.001   |                        |         | NA                        | -       | 0.559<br>(0.516-0.606) | 0.001   |
| Rivaroxaban | 0.627<br>(0.399-0.987) | 0.044   | 0.413<br>(0.253-0.674) | 0.001   | 2.336<br>(1.888-2.991) | 0.001   | 2.840<br>(1.893-4.261) | 0.001   | NA                        | -       | 1.787<br>(1.643-1.944) | 0.001   |
| Edoxaban    | NA                     |         | 0.813<br>(0.503-1.314) | 0.001   | -                      | 0.996   | 0.131<br>(0.082-0.210) | 0.001   | NA                        | -       | -                      | -       |
| Dabigatran  | NA                     |         | 0.021<br>(0.003-0.148) | 0.001   | -                      | 0.993   | 2.658<br>(2.076-3.403) | 0.001   | 0.520<br>(0.396-0.684)    | 0.001   | -                      | -       |

Variables adjusted for significant bleeding: ethnic group, gender, Cat. length of stay (LoS), BMI Cat, emergency visits, bleeding risk, mortality, treatment years, comorbidity, ~~apixaban~~, rivaroxaban, edoxaban, dabigatran.

Variables adjusted for stroke: ethnic group, gender, Cat. length of stay (LoS), BMI Cat, emergency visits, bleeding risk, mortality, treatment years, comorbidity, apixaban, rivaroxaban, edoxaban, dabigatran.

Variables adjusted for thromboembolic event: ethnic group, gender, Cat. length of stay (LoS), BMI Cat, emergency visits, bleeding risk, mortality, treatment years, comorbidity, ~~apixaban~~, rivaroxaban, edoxaban, dabigatran.

Variables adjusted for mortality: ethnic group, gender, Cat. length of stay (LoS), BMI Cat, emergency visits, bleeding risk, stroke, treatment days, comorbidity, apixaban, rivaroxaban, edoxaban, dabigatran.

Variables adjusted for emergency visits: ethnic group, gender, Cat. length of stay (LoS), BMI Cat, emergency visits, bleeding risk, mortality, treatment years, comorbidity, apixaban, rivaroxaban, edoxaban, dabigatran.

Variables adjusted for LoS: ethnic group, gender, BMI Cat, emergency visits, bleeding risk, mortality, treatment years, comorbidity, apixaban, rivaroxaban, edoxaban, dabigatran.

Table S8: Results of multivariate logistic regression analysis (showing the likelihood of the outcomes (odds ratio) for the CKD categories (Stage 3a)

| DOACs       | CRNMB                    |         | Ischaemic stroke       |         | Any TE events          |         | All-cause mortality    |         | LoS<br>(More than a week) |         | Emergency visit        |         |
|-------------|--------------------------|---------|------------------------|---------|------------------------|---------|------------------------|---------|---------------------------|---------|------------------------|---------|
|             | OR<br>(95% CI)           | p-value | OR<br>(95% CI)         | p-value | OR<br>(95% CI)         | p-value | OR<br>(95% CI)         | p-value | OR<br>(95% CI)            | p-value | OR<br>(95% CI)         | p-value |
| Apixaban    | 23.676<br>(5.836-96.050) | 0.001   | 2.453<br>(2.102-2.862) | 0.001   | 3.711<br>(1.808-7.614) | 0.001   | 0.866<br>(0.788-0.953) | 0.003   | -                         | -       | 0.732<br>(0.656-0.816) | 0.001   |
| Rivaroxaban | -                        | -       | 2.560<br>(0.917-7.146) | 0.073   | 0.327<br>(0.160-0.672) | 0.002   | 4.404<br>(2.814-6.892) | 0.001   | -                         | -       | 0.719<br>(0.514-1.006) | 0.054   |
| Edoxaban    | -                        | -       | 0.391<br>(0.140-1.090) | 0.073   | -                      | -       | 0.227<br>(0.145-0.355) | 0.001   | -                         | -       | 2.070<br>(0.992-4.319) | 0.053   |
| Dabigatran  | -                        | -       | -                      | -       | -                      | -       | 2.087<br>(1.523-2.860) | 0.001   | 0.571<br>(0.417-0.784)    | 0.001   | -                      | -       |

Variables adjusted for significant bleeding: ethnic group, gender, Cat. length of stay (LoS), BMI Cat, emergency visits, bleeding risk, mortality, treatment years, comorbidity, apixaban, rivaroxaban, edoxaban, dabigatran.

Variables adjusted for stroke: ethnic group, gender, Cat. length of stay (LoS), BMI Cat, emergency visits, bleeding risk, mortality, treatment years, comorbidity, apixaban, rivaroxaban, edoxaban, dabigatran..

Variables adjusted for thromboembolic event: ethnic group, gender, Cat. length of stay (LoS), BMI Cat, emergency visits, bleeding risk, mortality, treatment years, comorbidity, apixaban, rivaroxaban, edoxaban, dabigatran.

Variables adjusted for mortality: ethnic group, gender, Cat. length of stay (LoS), BMI Cat, emergency visits, bleeding risk, stroke, treatment days, comorbidity, apixaban, rivaroxaban, edoxaban, dabigatran.

Variables adjusted for emergency visits: ethnic group, gender, Cat. length of stay (LoS), BMI Cat, emergency visits, bleeding risk, mortality, treatment years, comorbidity, apixaban, rivaroxaban, edoxaban, dabigatran.

Variables adjusted for LoS: ethnic group, gender, BMI Cat, emergency visits, bleeding risk, mortality, treatment years, comorbidity, apixaban, rivaroxaban, edoxaban, dabigatran.

Table S9: Results of multivariate logistic regression analysis (showing the likelihood of the outcomes (odds ratio) for the CKD categories (Stage 3b)

| DOACs       | CRNMB          |         | Ischaemic stroke          |         | Any TE events           |         | All-cause mortality    |         | LoS<br>(More than a week) |         | Emergency visit        |         |
|-------------|----------------|---------|---------------------------|---------|-------------------------|---------|------------------------|---------|---------------------------|---------|------------------------|---------|
|             | OR<br>(95% CI) | p-value | OR<br>(95% CI)            | p-value | OR<br>(95% CI)          | p-value | OR<br>(95% CI)         | p-value | OR<br>(95% CI)            | p-value | OR<br>(95% CI)         | p-value |
| Apixaban    | -              | -       | 2.306<br>(1.878-2.830)    | 0.001   | 4.655<br>(1.706-12.701) | 0.003   | -                      |         | 1.240<br>(1.078-1.426)    | 0.003   | 0.623<br>(0.539-0.719) | 0.001   |
| Rivaroxaban | -              | -       | 0.423<br>(0.344-0.522)    | 0.001   | -                       |         | -                      |         | 0.800<br>(0.695-0.921)    | 0.002   | -                      |         |
| Edoxaban    | -              | -       |                           |         | -                       |         | -                      |         |                           |         | -                      |         |
| Dabigatran  | -              | -       | 33.473<br>(19.128-58.577) | 0.001   | -                       |         | 1.937<br>(1.140-3.294) | 0.015   | 0.432<br>(0.264-0.706)    | 0.001   | -                      |         |

Variables adjusted for significant bleeding: ethnic group, gender, Cat. length of stay (LoS), BMI Cat, emergency visits, bleeding risk, mortality, treatment years, comorbidity, apixaban, rivaroxaban, edoxaban, dabigatran.

Variables adjusted for stroke: ethnic group, gender, Cat. length of stay (LoS), BMI Cat, emergency visits, bleeding risk, mortality, treatment years, comorbidity, apixaban, rivaroxaban, edoxaban, dabigatran..

Variables adjusted for thromboembolic event: ethnic group, gender, Cat. length of stay (LoS), BMI Cat, emergency visits, bleeding risk, mortality, treatment years, comorbidity, apixaban, rivaroxaban, edoxaban, dabigatran.

Variables adjusted for mortality: ethnic group, gender, Cat. length of stay (LoS), BMI Cat, emergency visits, bleeding risk, stroke, treatment days, comorbidity, apixaban, rivaroxaban, edoxaban, dabigatran.

Variables adjusted for emergency visits: ethnic group, gender, Cat. length of stay (LoS), BMI Cat, emergency visits, bleeding risk, mortality, treatment years, comorbidity, apixaban, rivaroxaban, edoxaban, dabigatran.

Variables adjusted for LoS: ethnic group, gender, BMI Cat, emergency visits, bleeding risk, mortality, treatment years, comorbidity, apixaban, rivaroxaban, edoxaban, dabigatran.



Table S10: Results of multivariate logistic regression analysis (showing the likelihood of the outcomes (odds ratio) for the CKD categories (Stage 4)

| DOACs       | CRNMB          |         | Ischaemic stroke         |         | Any TE events          |         | All-cause mortality    |         | LoS<br>(More than a week) |         | Emergency visit        |         |
|-------------|----------------|---------|--------------------------|---------|------------------------|---------|------------------------|---------|---------------------------|---------|------------------------|---------|
|             | OR<br>(95% CI) | p-value | OR<br>(95% CI)           | p-value | OR<br>(95% CI)         | p-value | OR<br>(95% CI)         | p-value | OR<br>(95% CI)            | p-value | OR<br>(95% CI)         | p-value |
| Apixaban    | NA             | -       | 13.654<br>(6.005-31.046) | 0.001   | NA                     | -       | NA                     | -       | NA                        | -       | 0.664<br>(0.510-0.866) | 0.003   |
| Rivaroxaban | NA             | -       | NA                       | -       | 0.001<br>(0.000-0.011) | 0.001   | NA                     | -       | 0.453<br>(0.171-1.198)    | 0.110   | 0.455<br>(0.205-1.008) | 0.052   |
| Edoxaban    | NA             | -       | NA                       | -       | -                      | 0.001   | 2.301<br>(0.833-6.356) | 0.108   | 4.611<br>(0.627-33.924)   | 0.133   | NA                     | -       |
| Dabigatran  | NA             | -       | 4.831<br>(1.040-22.450)  | 0.044   | -                      | -       | NA                     | -       | NA                        | -       | NA                     | -       |

Variables adjusted for significant bleeding: ethnic group, gender, Cat. length of stay (LoS), BMI Cat, emergency visits, bleeding risk, mortality, treatment years, comorbidity, apixaban, rivaroxaban, edoxaban, dabigatran.

Variables adjusted for stroke: ethnic group, gender, Cat. length of stay (LoS), BMI Cat, emergency visits, bleeding risk, mortality, treatment years, comorbidity, apixaban, rivaroxaban, edoxaban, dabigatran..

Variables adjusted for thromboembolic event: ethnic group, gender, Cat. length of stay (LoS), BMI Cat, emergency visits, bleeding risk, mortality, treatment years, comorbidity, apixaban, rivaroxaban, edoxaban, dabigatran.

Variables adjusted for mortality: ethnic group, gender, Cat. length of stay (LoS), BMI Cat, emergency visits, bleeding risk, stroke, treatment days, comorbidity, apixaban, rivaroxaban, edoxaban, dabigatran.

Variables adjusted for emergency visits: ethnic group, gender, Cat. length of stay (LoS), BMI Cat, emergency visits, bleeding risk, mortality, treatment years, comorbidity, apixaban, rivaroxaban, edoxaban, dabigatran.

Variables adjusted for LoS: ethnic group, gender, BMI Cat, emergency visits, bleeding risk, mortality, treatment years, comorbidity, apixaban, rivaroxaban, edoxaban, dabigatran.

Table S11: Results of multivariate logistic regression analysis (showing the likelihood of the outcomes (odds ratio) for the CKD categories (Stage 5)

| DOACs       | Significant bleeding |         | Ischaemic stroke        |         | Thromboembolic events |         | All-cause mortality    |         | LoS<br>(More than a week) |         | Emergency visit           |         |
|-------------|----------------------|---------|-------------------------|---------|-----------------------|---------|------------------------|---------|---------------------------|---------|---------------------------|---------|
|             | OR<br>(95% CI)       | p-value | OR<br>(95% CI)          | p-value | OR<br>(95% CI)        | p-value | OR<br>(95% CI)         | p-value | OR<br>(95% CI)            | p-value | OR<br>(95% CI)            | p-value |
| Apixaban    | -                    | -       | 7.340<br>(1.519-35.472) | 0.013   | -                     | -       | 0.283<br>(0.138-0.578) | 0.001   | NA                        | -       | NA                        | -       |
| Rivaroxaban | -                    | -       | NA                      | -       | -                     | -       | NA                     | -       | NA                        | -       | 51.057<br>(7.662-340.233) | 0.001   |
| Edoxaban    | -                    | -       | NA                      | -       | -                     | -       | NA                     | -       | NA                        | -       | 0.034<br>(0.006-0.200)    | 0.001   |
| Dabigatran  | -                    | -       | NA                      | -       | -                     | -       | NA                     | -       | NA                        | -       | NA                        | -       |

Variables adjusted for significant bleeding: ethnic group, gender, Cat. length of stay (LoS), BMI Cat, emergency visits, bleeding risk, mortality, treatment years, comorbidity, apixaban, rivaroxaban, edoxaban, dabigatran.

Variables adjusted for stroke: ethnic group, gender, Cat. length of stay (LoS), BMI Cat, emergency visits, bleeding risk, mortality, treatment years, comorbidity, apixaban, rivaroxaban, edoxaban, dabigatran..

Variables adjusted for thromboembolic event: ethnic group, gender, Cat. length of stay (LoS), BMI Cat, emergency visits, bleeding risk, mortality, treatment years, comorbidity, apixaban, rivaroxaban, edoxaban, dabigatran.

Variables adjusted for mortality: ethnic group, gender, Cat. length of stay (LoS), BMI Cat, emergency visits, bleeding risk, stroke, treatment days, comorbidity, apixaban, rivaroxaban, edoxaban, dabigatran.

Variables adjusted for emergency visits: ethnic group, gender, Cat. length of stay (LoS), BMI Cat, emergency visits, bleeding risk, mortality, treatment years, comorbidity, apixaban, rivaroxaban, edoxaban, dabigatran.

Variables adjusted for LoS: ethnic group, gender, BMI Cat, emergency visits, bleeding risk, mortality, treatment years, comorbidity, apixaban, rivaroxaban, edoxaban, dabigatran.
